# Supplementary material for: A novel symmetrical imidazole-containing framework as a fluorescence sensor for selectively detecting silver ions
Source: Royal Society of Chemistry journal article supplement (doi:10.1039/d1an01687c), 2021-01-01
Supplement: d1an01687c1.pdf [file d1an01687c1.pdf]

## Supporting Information

### A novel symmetrical imidazole framework as a fluorescence sensor for selective detection of Silver ions

Junjie Wang, Zhenni Lan, Shili Hou\*, Shifeng Hou

Guangxi Key Laboratory of Electrochemical and Magneto-chemical Functional Materials, College of Chemistry and Bioengineering, Guilin University of Technology, Guangxi 541006, P. R. China.

#### Contents

|           |                                                                                                               |   |
|-----------|---------------------------------------------------------------------------------------------------------------|---|
| Fig. S1.  | <sup>1</sup> H NMR spectrum of compound <b>1</b>                                                              | 1 |
| Fig. S2.  | <sup>13</sup> C NMR spectrum of compound <b>1</b>                                                             | 1 |
| Fig. S3.  | <sup>1</sup> H NMR spectrum of compound <b>2</b>                                                              | 2 |
| Fig. S4.  | <sup>13</sup> C NMR spectrum of compound <b>2</b>                                                             | 2 |
| Fig. S5.  | <sup>1</sup> H NMR spectrum of <b>BIB</b>                                                                     | 3 |
| Fig. S6.  | <sup>13</sup> C NMR spectrum of <b>BIB</b>                                                                    | 3 |
| Fig. S7.  | HRMS spectrum of compound <b>1</b>                                                                            | 4 |
| Fig. S8.  | HRMS spectrum of compound <b>2</b>                                                                            | 4 |
| Fig. S9.  | HRMS spectrum of <b>BIB</b>                                                                                   | 4 |
| Fig. S10. | The response time of <b>BIB</b> in absence and presence of Ag <sup>+</sup>                                    | 5 |
| Fig. S11. | Reversibility of <b>BIB</b> upon sequential addition of Ag <sup>+</sup> and NH <sub>3</sub> ·H <sub>2</sub> O | 5 |
| Fig. S12. | Photographs of test paper strips for detecting real samples                                                   | 6 |
| Fig. S13. | The water content in DMF-H <sub>2</sub> O affects the detection of Ag <sup>+</sup> ions                       | 6 |
| Fig. S14. | The response of the detection of Ag <sup>+</sup> ions in other solvents                                       | 6 |
| Table S1  | Determination of Ag <sup>+</sup> in real samples using AAS analysis                                           | 7 |
| Table S2  | Determination of Ag <sup>+</sup> in real samples using test paper strips                                      | 7 |

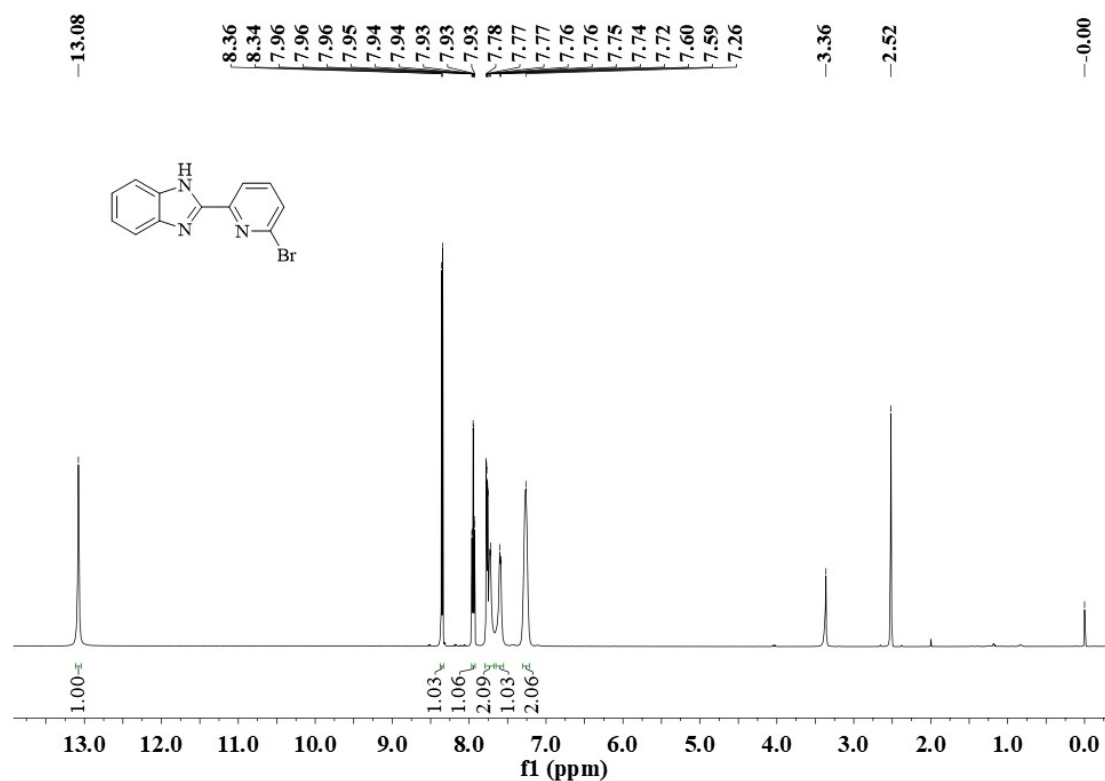

Fig. S1. <sup>1</sup>H NMR spectrum of compound 1

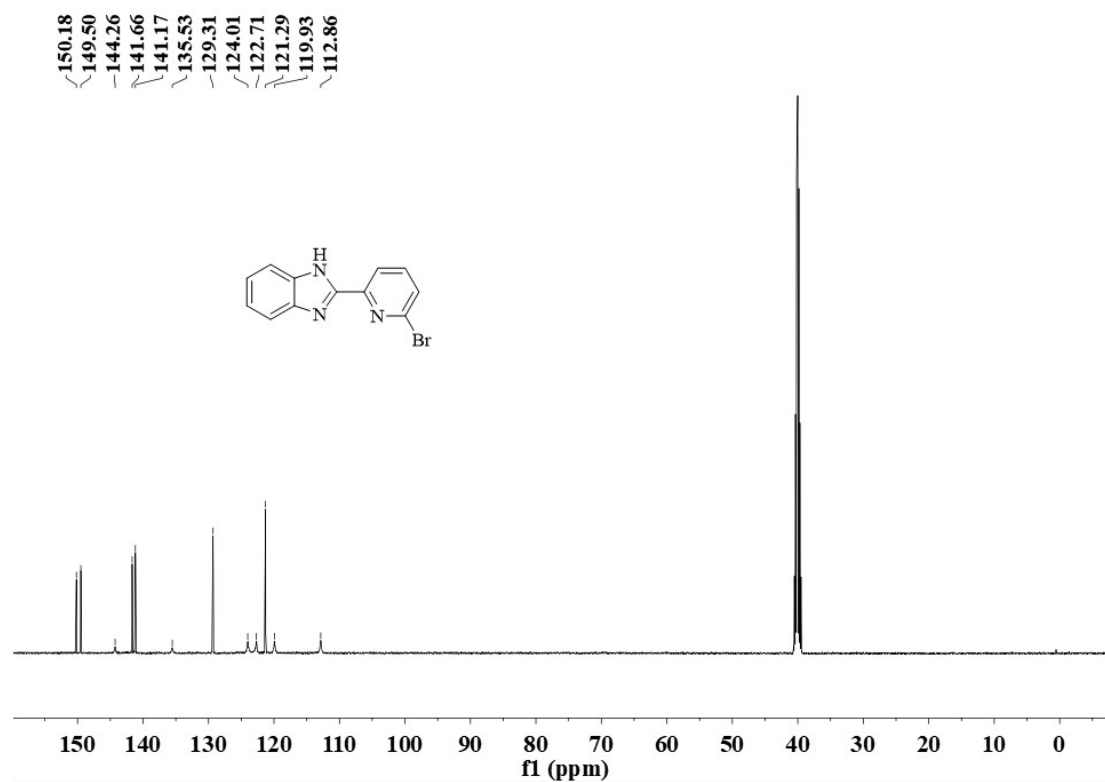

Fig. S2. <sup>13</sup>C NMR spectrum of compound 1

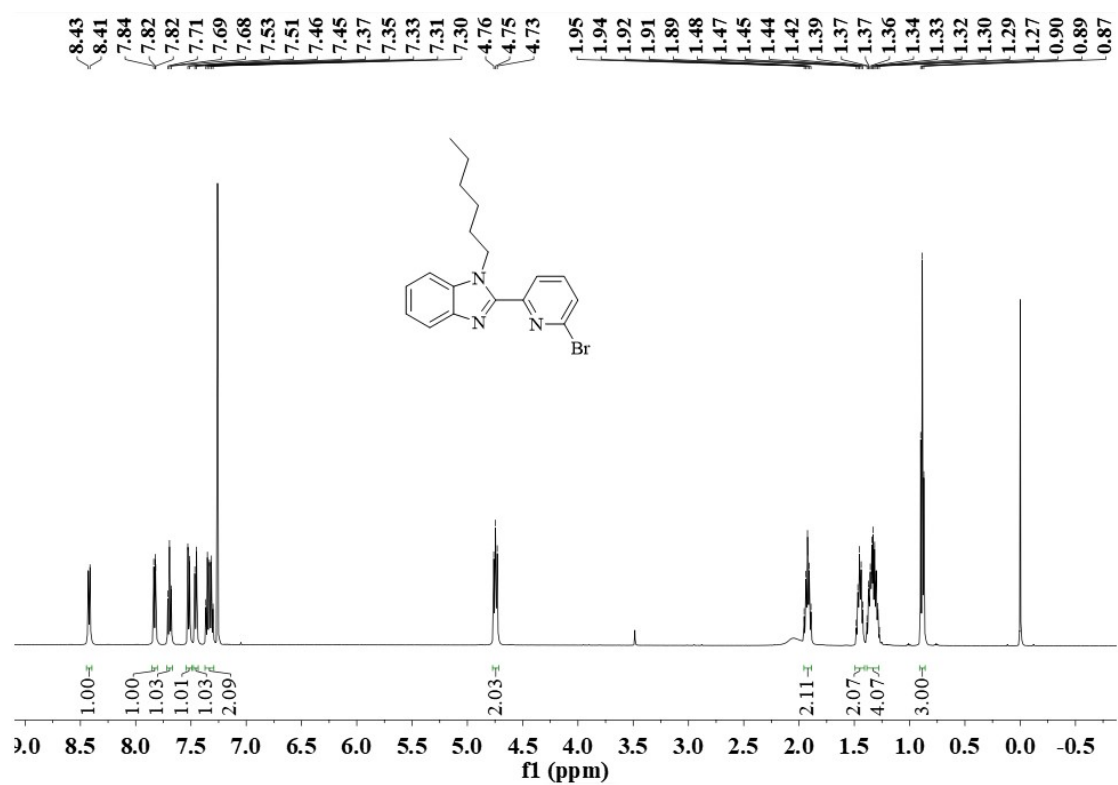

Fig. S3. <sup>1</sup>H NMR spectrum of compound 2

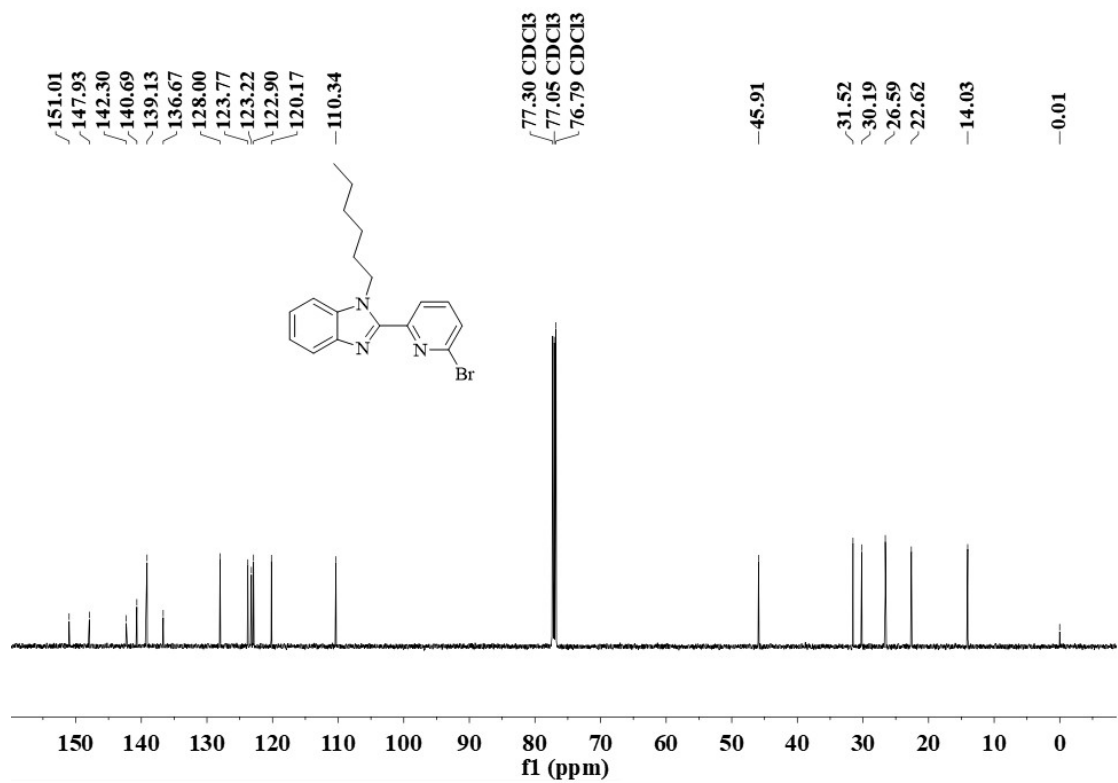

Fig. S4. <sup>13</sup>C NMR spectrum of compound 2

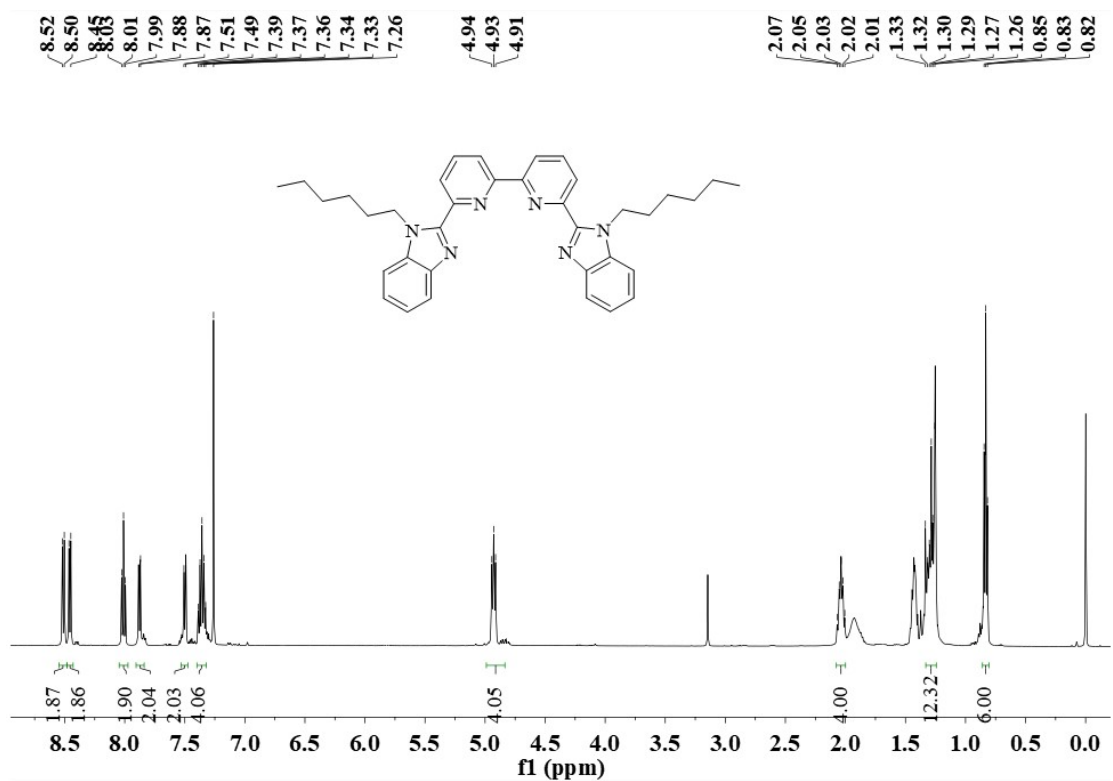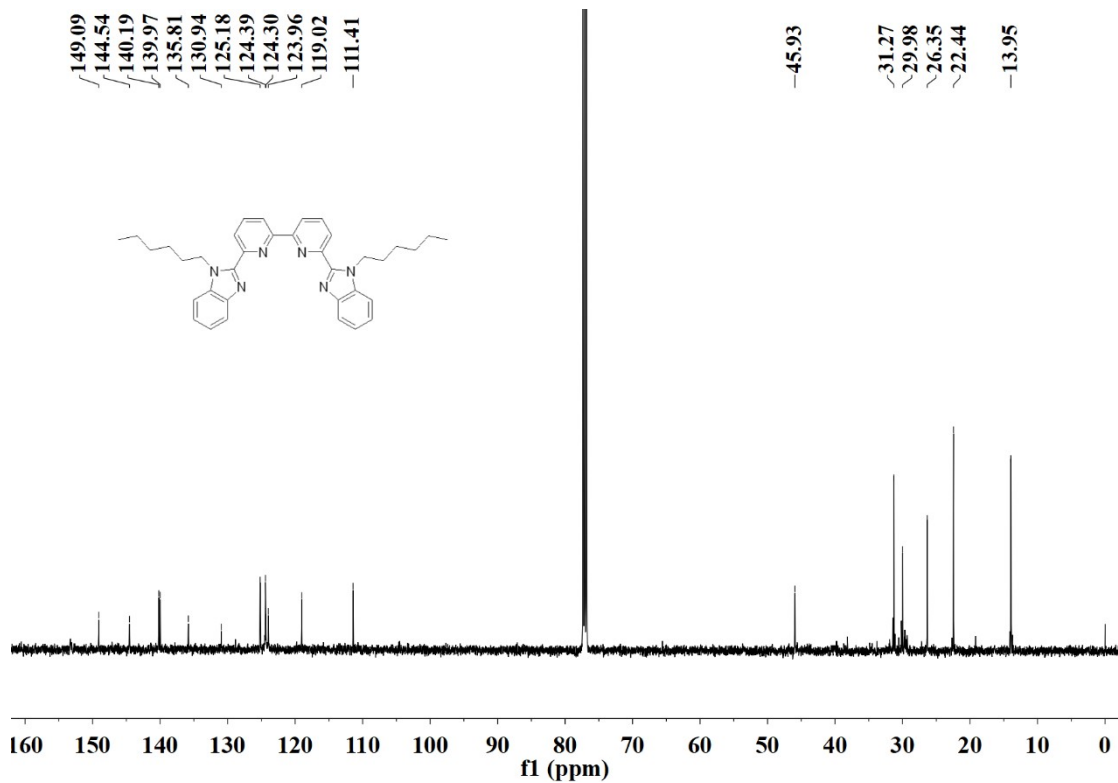

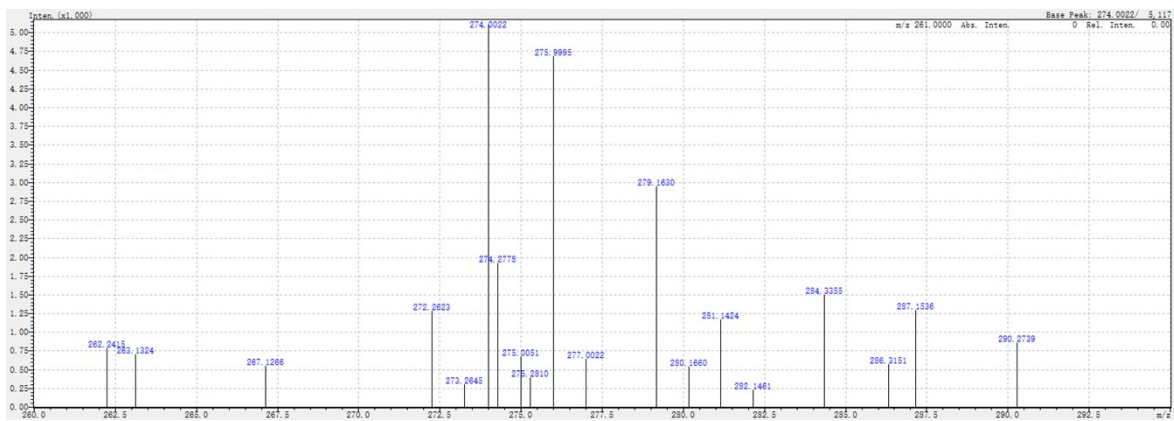

**Fig. S7.** HRMS spectrum of compound 1

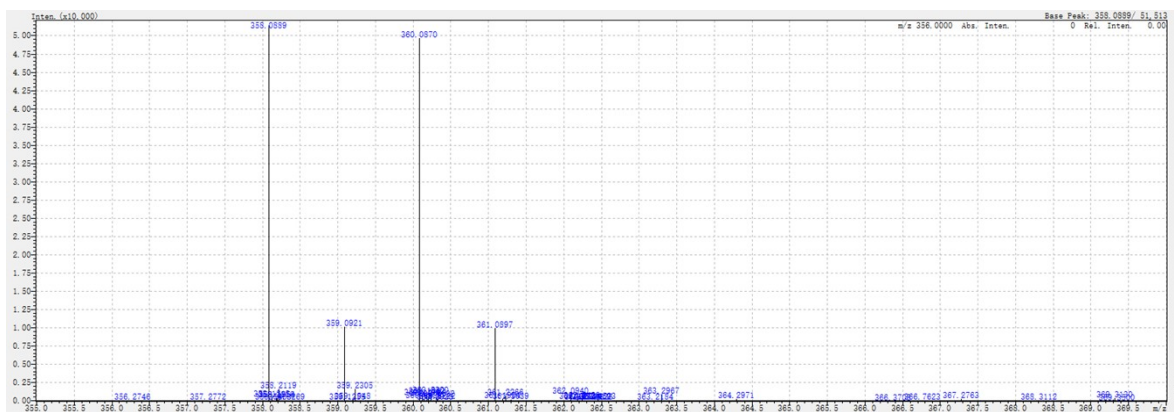

**Fig. S8.** HRMS spectrum of compound 2

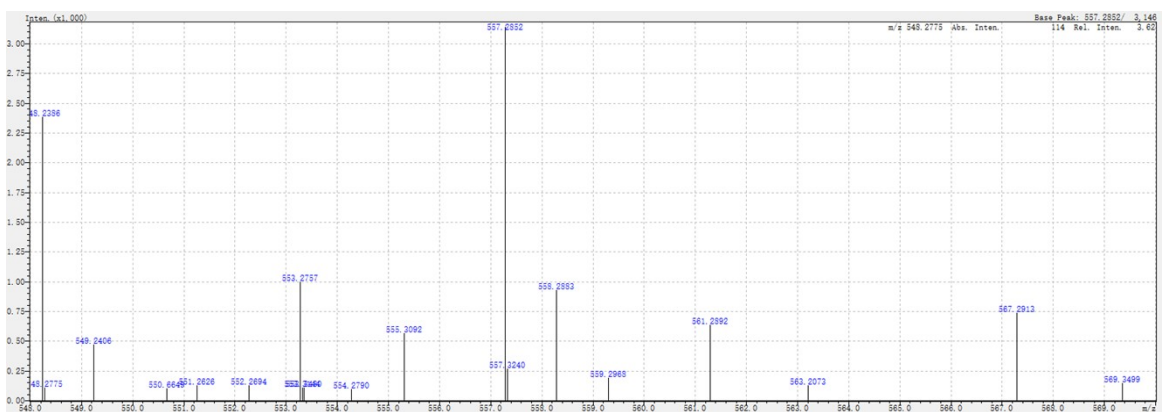

**Fig. S9.** HRMS spectrum of imidazoles BIB

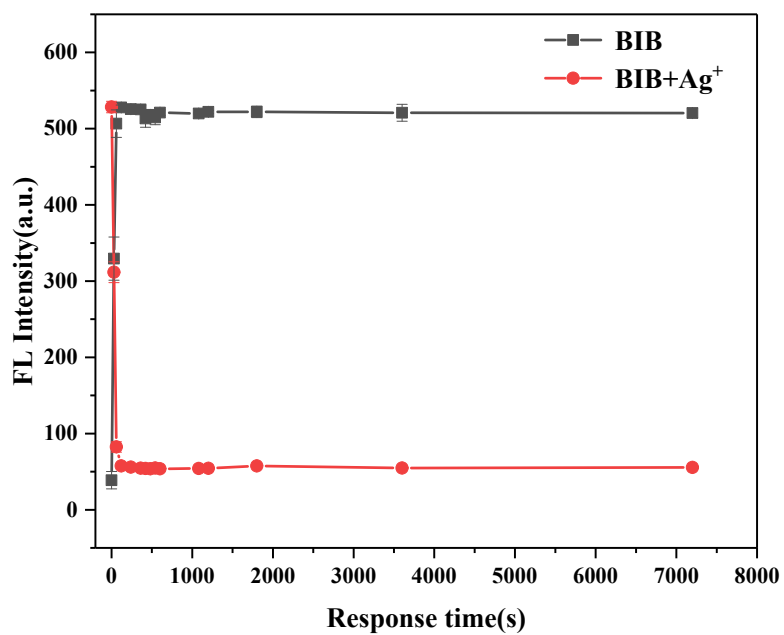

Fig. S10. The response time of **BIB** in the absence and presence of Ag<sup>+</sup>.

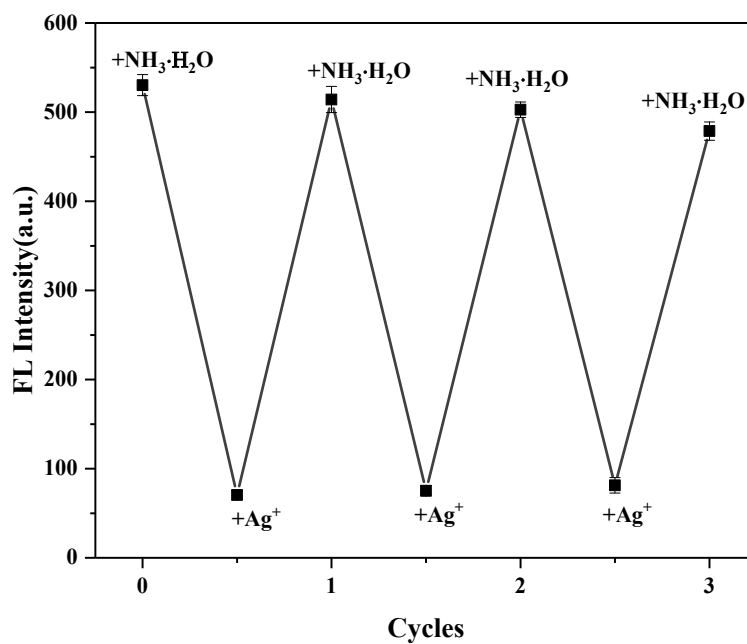

Fig. S11. Reversibility of **BIB** upon sequential addition of Ag<sup>+</sup> and NH<sub>3</sub>·H<sub>2</sub>O.

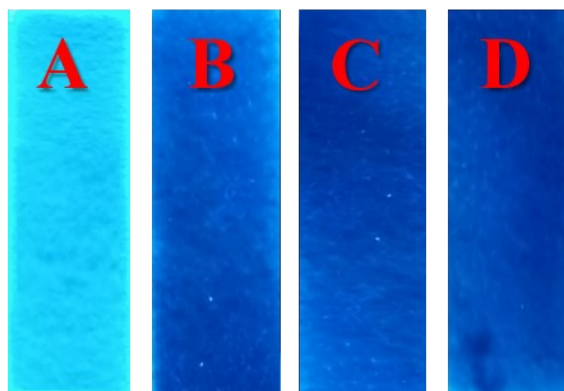

**Fig. S12.** Photographs of test paper strips with **BIB** (A: Blank) for detecting city water (B), lake water of university (C), and drinking water in market (D) with  $\text{Ag}^+$  ( $3 \mu\text{M}$ ) under UV light at 365 nm.

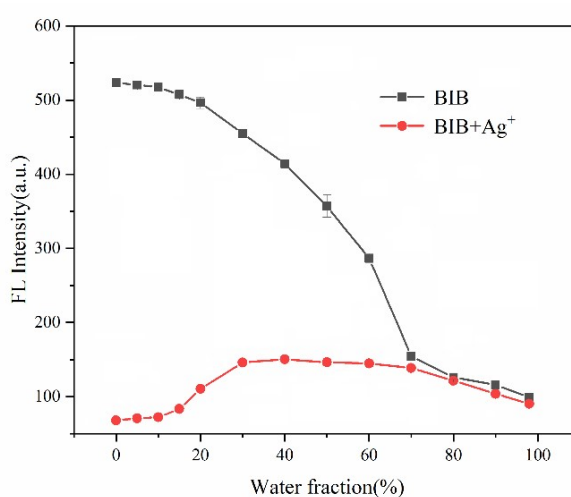

**Fig. S13.** The water content in DMF-H<sub>2</sub>O affects the detection of  $\text{Ag}^+$  ions.

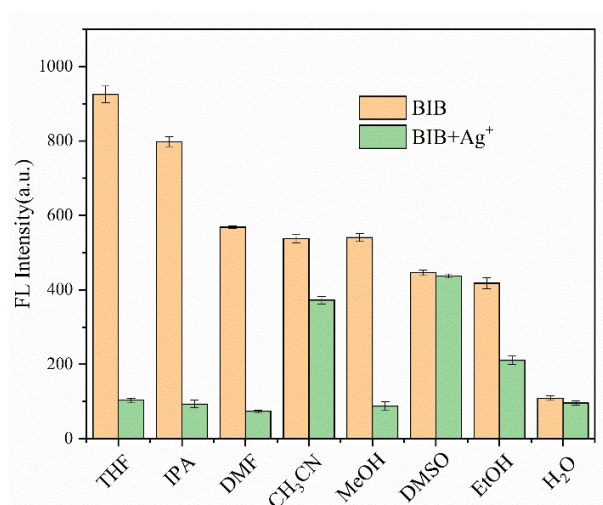

**Fig. S14.** The response of the detection of  $\text{Ag}^+$  ions in other solvents.

**Table S1.** Determination of Ag<sup>+</sup> in real samples using AAS analysis (n=3).

| Real samples             | Added<br>( $\times 10^{-6}\text{mol}\cdot\text{L}^{-1}$ ) | Found<br>( $\times 10^{-6}\text{mol}\cdot\text{L}^{-1}$ ) | Recovery<br>(%) | RSD<br>(%) |
|--------------------------|-----------------------------------------------------------|-----------------------------------------------------------|-----------------|------------|
| city water               | 2.00                                                      | 2.08                                                      | 104.00          | 0.37       |
|                          | 4.00                                                      | 4.16                                                      | 104.00          | 1.06       |
| lake water of University | 2.00                                                      | 2.42                                                      | 121.00          | 2.31       |
|                          | 4.00                                                      | 4.09                                                      | 102.25          | 0.42       |
| drinking water in market | 2.00                                                      | 2.21                                                      | 110.50          | 0.54       |
|                          | 4.00                                                      | 4.39                                                      | 109.75          | 1.86       |

**Table S2.** Determination of Ag<sup>+</sup> in real samples using test paper strips (n=5).

| Real samples             | Added<br>( $\times 10^{-6}\text{mol}\cdot\text{L}^{-1}$ ) | Found<br>( $\times 10^{-6}\text{mol}\cdot\text{L}^{-1}$ ) | Recovery<br>(%) | RSD<br>(%) |
|--------------------------|-----------------------------------------------------------|-----------------------------------------------------------|-----------------|------------|
| city water               | 3.00                                                      | 3.48                                                      | 116.00          | 2.09       |
| lake water of University | 3.00                                                      | 3.22                                                      | 107.00          | 3.63       |
| drinking water in market | 3.00                                                      | 2.89                                                      | 96.33           | 3.21       |
